# Supplementary material for: AKT Mediates Adiponectin-Dependent Regulation of VSMC Phenotype
Source: MDPI journal article supplement (doi:10.3390/cells12202493), 2023-10-20

## Supplemental Materials, Methods, and Figures

### Methods

#### 1.2 Genotyping

Mice were gently sedated with isoflurane to have tail tip collected and ears punched for identification. DNA from tails was isolated using the Quanta Accustart II Mouse Genotyping Kit (Quanta Biosciences, 95091). PCR was then run in a Mastercycler Nexus Gradient (Eppendorf). Primers sequences were obtained from Jackson Laboratory genotyping protocols database and were purchased from Sigma Aldrich. The sequence of the primers is shown in Table S1.

**Table S1.** Sequence of genotyping primers

| Gene   | Primer ID | Sequence                      | Primer type    |
|--------|-----------|-------------------------------|----------------|
| ApoE   | oIMR0180  | GCC TAG CCG AGG GAG AGC CG    | Common Forward |
|        | oIMR0181  | TGT GAC TTG GGA GCT CTG CAG C | WT reverse     |
|        | oIMR0182  | GCC GCC CCG ACT GCA TCT       | Mutant reverse |
| Adipoq | 28949     | GGT GGC TCA CAA CCA TTC A     | Common Forward |
|        | 28950     | CTC CCA GGA GGT CTT CAT CA    | WT reverse     |
|        | 24955     | CTT CCT GAC TAG GGG AGG AG    | Mutant reverse |

**Table S2.** List of antibodies

| Target antigen                                       | Vendor or Source | Catalog #     | Working concentration | Persistent ID / URL |
|------------------------------------------------------|------------------|---------------|-----------------------|---------------------|
| Rabbit phospho-Acetyl CoA Carboxylase (p-ACC, Ser79) | Cell Signaling   | Cat#3676T     | 1:500                 |                     |
| Rabbit monoclonal Akt (Pan)                          | Cell Signaling   | Cat#4691      | 1:1000                | RRID:AB_915783      |
| Rabbit monoclonal phospho-Akt (Ser 473)              | Cell Signaling   | Cat#4060      | 1:500                 | RRID:AB_2315049     |
| Rabbit AMPK                                          | Cell Signaling   | Cat#5831S     | 1:500                 | RRID:AB_10622186    |
| Rabbit p-AMPK (Thr172)                               | Cell Signaling   | Cat#2535S     | 1:500                 |                     |
| Rabbit Cyclin D1                                     | Cell Signaling   | Cat#2922S     | 1:500                 | RRID:AB_2228523     |
| Rabbit Decorin                                       | Abcam            | Cat#ab175404  | 1:1000                | RRID:AB_2890261     |
| Rabbit EGFR                                          | Santa Cruz       | Cat#sc-373746 | 1:500                 | RRID:AB_10920395    |
| Rabbit Elastin                                       | Abcam            | Cat#ab217356  | 1:500                 | RRID:AB_2827685     |
| Rabbit polyclonal ERK1/2                             | Cell Signaling   | Cat#9102      | 1:1000                | RRID:AB_330744      |

|                                                   |                          |                |         |                  |
|---------------------------------------------------|--------------------------|----------------|---------|------------------|
| Rabbit monoclonal phospho-ERK1/2 (Thr202/Tyr 204) | Cell Signaling           | Cat#4370       | 1:500   | RRID:AB_2315112  |
| Rabbit KLF4                                       | Abcam                    | Cat#ab106629   | 1:1000  |                  |
| Rabbit p-p38MAPK phosphor (Thr180/Tyr182)         | Cell Signaling           | Cat#9211       | 1:500   | RRID:AB_331641   |
| Rabbit p38                                        | Cell Signaling           | Cat#9212       | 1:1000  | RRID:AB_330713   |
| Rabbit MEK1/2                                     | Cell Signaling           | Cat#8727S      | 1:500   | RRID:AB_10829473 |
| Rabbit p-MEK (Ser 217/221)                        | Cell Signaling           | Cat#9154S      | 1:500   | RRID:AB_2138017  |
| Rabbit myosin heavy chain (MHC)                   | Abcam                    | Cat#ab124205   | 1:500   | RRID:AB_10974234 |
| Rabbit myosin light chain (MLC)                   | Cell Signaling           | Cat#3672S      | 1:500   | RRID:AB_10692513 |
| Rabbit p-MLC (Ser19)                              | Cell Signaling           | Cat#3671S      | 1:500   | RRID:AB_330248   |
| Mouse myocardin                                   | Sigma                    | Cat#SAB4200539 | 1:1000  |                  |
| Rabbit monoclonal MMP2                            | Abcam                    | Cat#ab92536    | 1:1000  | RRID:AB_10561597 |
| Rabbit monoclonal MMP9                            | Abcam                    | Cat#ab76003    | 1:500   | RRID:AB_1310463  |
| Rabbit monoclonal MMP3                            | Abcam                    | Cat#ab52915    | 1:500   | RRID:AB_881243   |
| Rabbit Smad2/3 (.                                 | Cell Signaling           | Cat#8685T      | 1:500   | RRID:AB_10889933 |
| Rabbit SRF                                        | Abcam                    | Cat#ab124205   | 1:1000  |                  |
| Rabbit TAGLN/SM22                                 | Abcam                    | Cat#ab14106    | 1:6000  | RRID:AB_443021   |
| Mouse monoclonal ACTA2/SM-Actin                   | Sigma-Aldrich            | Cat#ABT1485    | 1:10000 |                  |
| Mouse monoclonal TUBG1/Tubulin                    | Sigma-Aldrich            | Cat#T5326      | 1:2000  | RRID:AB_532292   |
| Rabbit GADPH                                      | Thermo Fisher Scientific | Cat#PA1-988    | 1:4000  | RRID:AB_2107310  |
| Rabbit p-mTOR (Ser2448)                           | Cell signaling           | Cat#2971S      | 1:1000  | RRID:AB_330970   |
| Rabbit mTOR                                       | Cell signaling           | Cat# 2972S     | 1:1000  | RRID:AB_330978   |
| Rabbit p-p70S6K Thr389                            | Cell signaling           | Cat#9205       | 1:2000  | RRID:AB_330944   |

**Table S3.** Reagents

| <i>Description</i>                 | <i>Source / Repository</i> | <i>Persistent ID / URL</i> |
|------------------------------------|----------------------------|----------------------------|
| AdipoRon                           | Sigma Aldrich              | Cat# SML0998-5MG           |
| TCN (Triciribine, Akt inhibitor V) | Millipore                  | Cat#124012-1MG             |

|                                                                                                        |                        |                                                                                                                     |
|--------------------------------------------------------------------------------------------------------|------------------------|---------------------------------------------------------------------------------------------------------------------|
| 2',7'-dichlorodihydrofluorescein diacetate (H <sub>2</sub> DCFDA)                                      | Invitrogen             | Cat#C6827                                                                                                           |
| DHE                                                                                                    | Life Technologies      | Cat#D11347                                                                                                          |
| MitoSox                                                                                                | Invitrogen             | Cat#M36008                                                                                                          |
| Erlotinib                                                                                              | Sigma Aldrich          | Cat#SML2156                                                                                                         |
| EZ Link Sulfo-NHS-Biotin                                                                               | Pierce                 | Cat#21217                                                                                                           |
| Metformin Hydrochloride                                                                                | Sigma Aldrich          | Cat#PHR1084-500MG                                                                                                   |
| Immobilized Neutravidin                                                                                | Pierce                 | Cat#29200                                                                                                           |
| PD-98059 MEK inhibitor                                                                                 | Enzo Life Sciences     | Cat#BML-E1360-0005                                                                                                  |
| SB-525334 TGF- $\beta$ inhibitor                                                                       | VWR                    | Cat#103539118                                                                                                       |
| Silver Stain Plus kit                                                                                  | Biorad                 | Cat#161-0449                                                                                                        |
| ImageJ 6.0                                                                                             | Schneider et al., 2012 | <a href="https://imagej.nih.gov/ij/">https://imagej.nih.gov/ij/</a>                                                 |
| xPONENT                                                                                                |                        | <a href="https://www.luminexcorp.com/xponent/">https://www.luminexcorp.com/xponent/</a>                             |
| IBM (International Business Machines) SPSS 25 (Statistical Package for the Social Sciences version 25) |                        | <a href="https://www.ibm.com/docs/en/spss-statistics/25.0.0">https://www.ibm.com/docs/en/spss-statistics/25.0.0</a> |

## Supplemental Figures

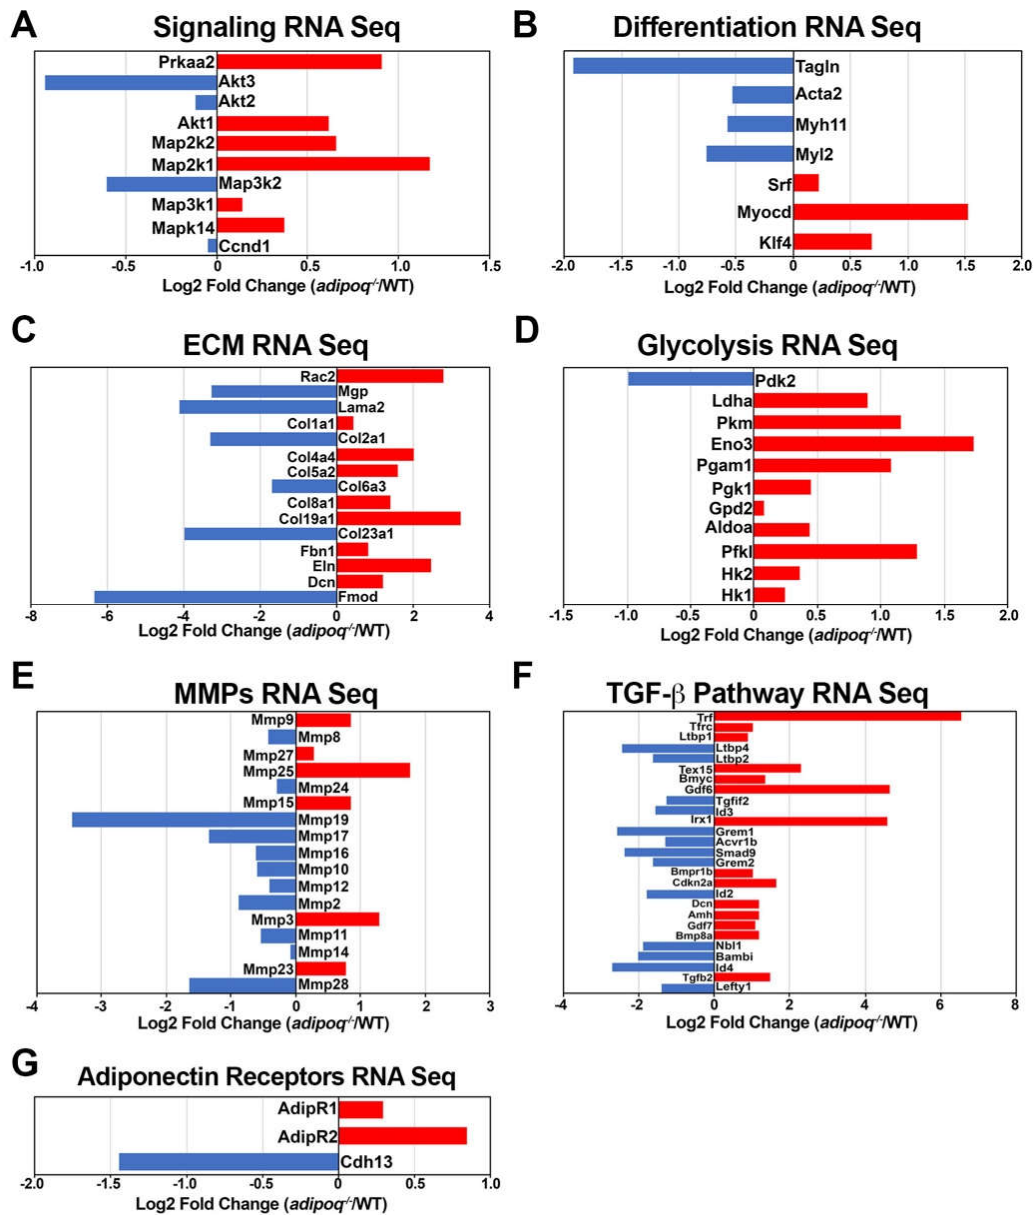

**Figure S1.** RNA expression profile of adiponectin deficient VSMCs. Changes in RNA expression of *adipoq*<sup>-/-</sup> compared with WT cells (log2 (fold change) is shown signaling (A), differentiation (B), ECM (C), glycolysis (D), MMPs (E), TGF-β (F) pathways and adiponectin receptors.

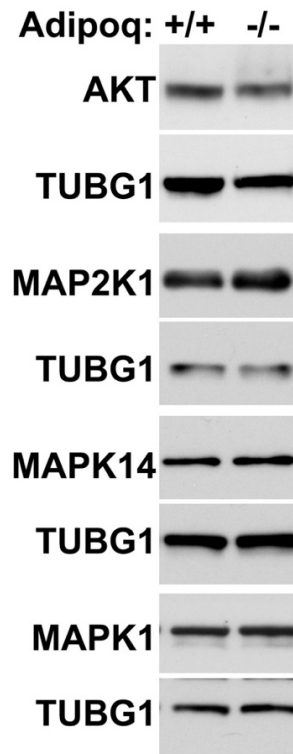

**Figure S2.** Protein expression of MAPK and AKT kinases in adiponectin deficient VSMCs. WT and adiponectin deficient ( $-/-$ ) cells were separated in 4-20% precast gels and tested with the indicated antibodies. Quantification of the protein expression, adjusted by the loading control, is shown in Figure 2E.

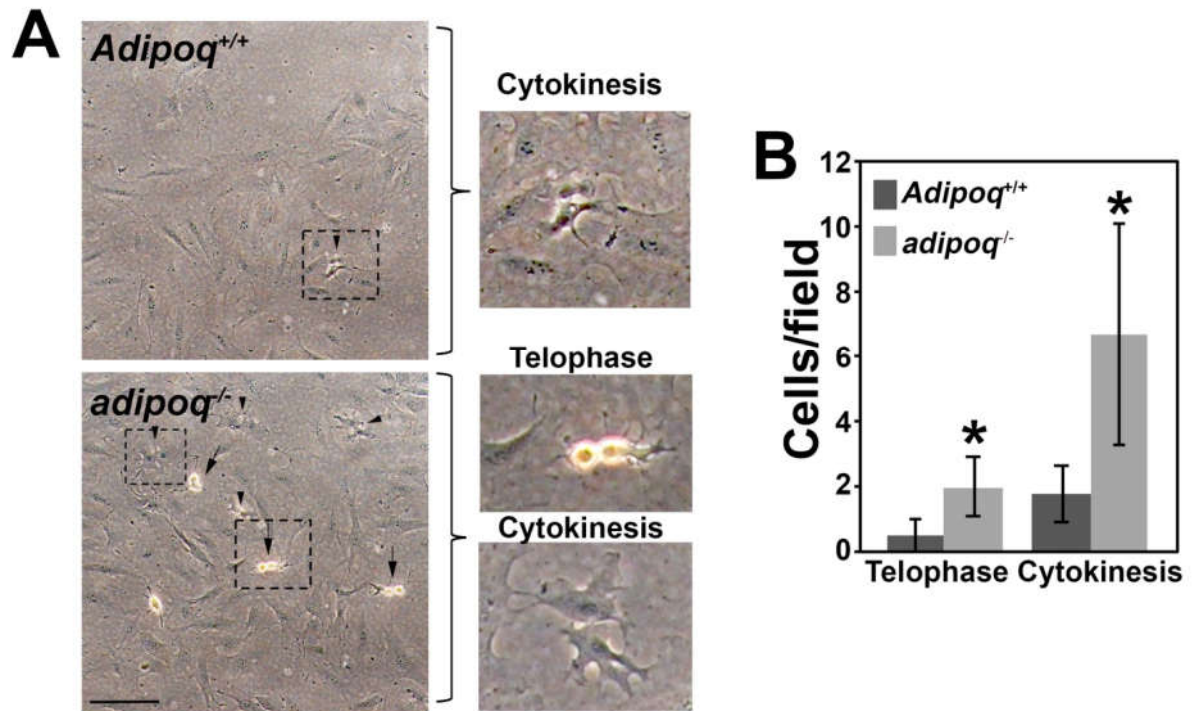

**Figure S3.** Adiponectin deficiency promotes proliferation. Cells cultured in media with 10% FBS at 70-80% confluency were fixed in 0.2% glutaraldehyde and imaged in an Axio Observer A1 microscope (Carl Zeiss) with a 10x objective (scale bar = 100  $\mu$ m) (A). Cells going through telophase and cytokinesis were quantified in 8 fields/genotype (B). Asterisk (\*) denotes  $p < 0.05$  compared with wild type cells.

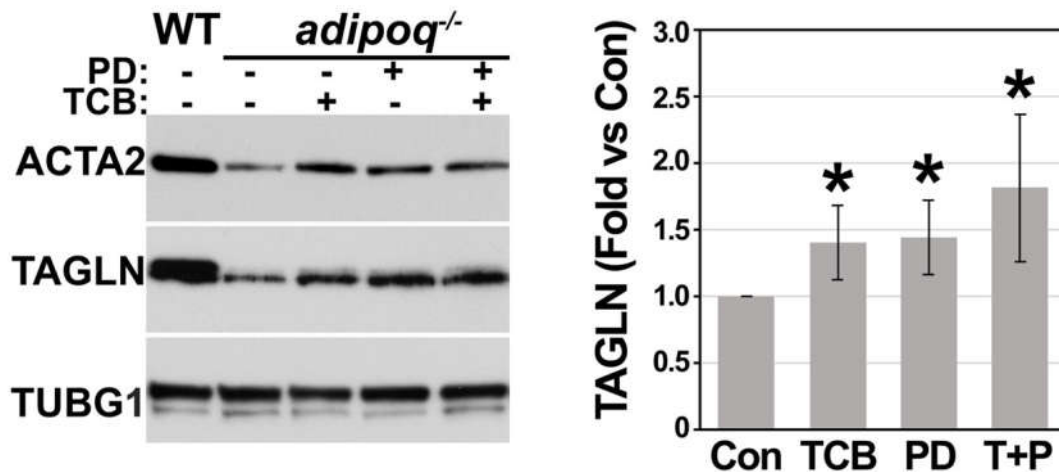

**Figure S4.** AKT and MAPK pathways regulate VSMC differentiation. Adiponectin deficient cells were starved in 0.2% FBS media for 24 h and then treated with 10  $\mu$ M TCB, PD-98059 or both for 24 h. The expression of ACTA2 and TAGLN was quantified as fold compared with control *adipoq*<sup>-/-</sup> cells. Asterisk (\*) denotes  $p < 0.05$ . Wild type (WT) cells are shown in lane 1.

Original data for western blots

Figure 2C

Order antibodies:

1) pAKT, rabbit

stripping

2) pMEK, rabbit

stripping

3) p-p38, rabbit

4) pERK, rabbit

5) Tubulin, mouse

1) Cyclin D1, rabbit

2) Tubulin, mouse

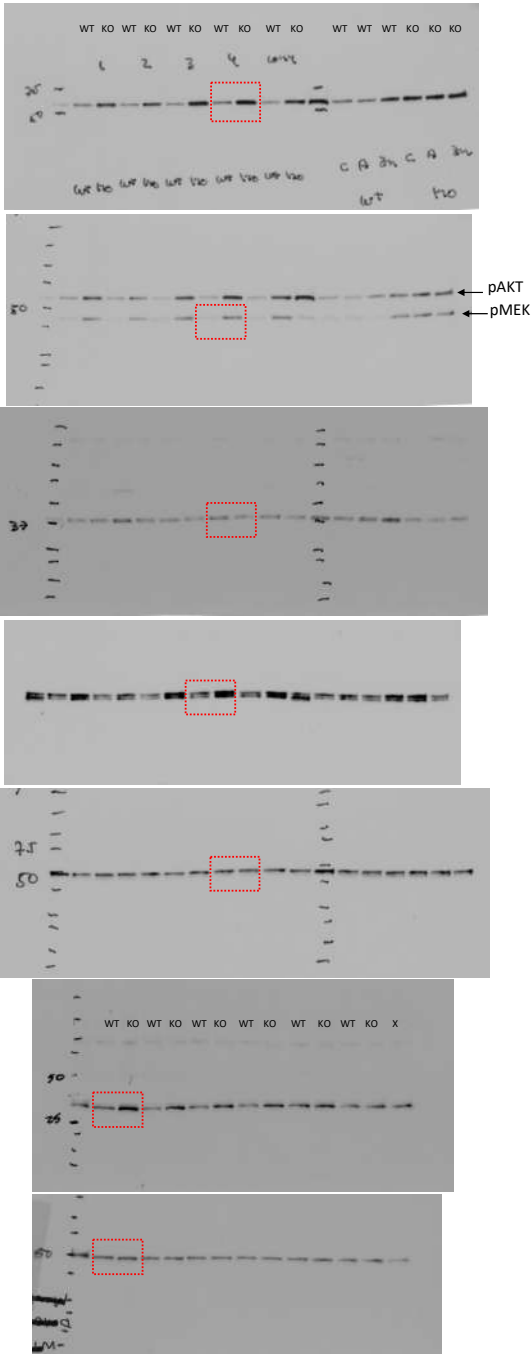

**Figure 2C**

1) Total AMPK, rabbit

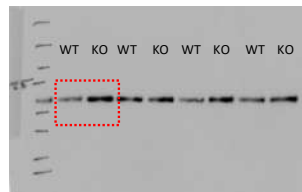

2) Tubulin, mouse

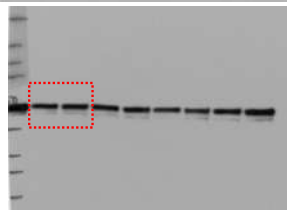

1) pAMPK, rabbit

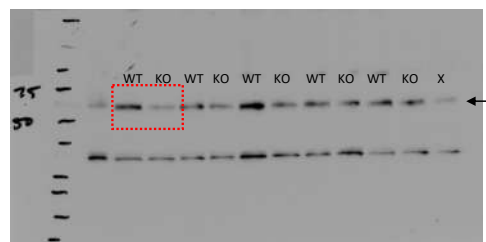

2) Tubulin, mouse

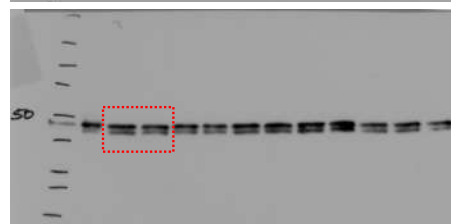



Figure 2D

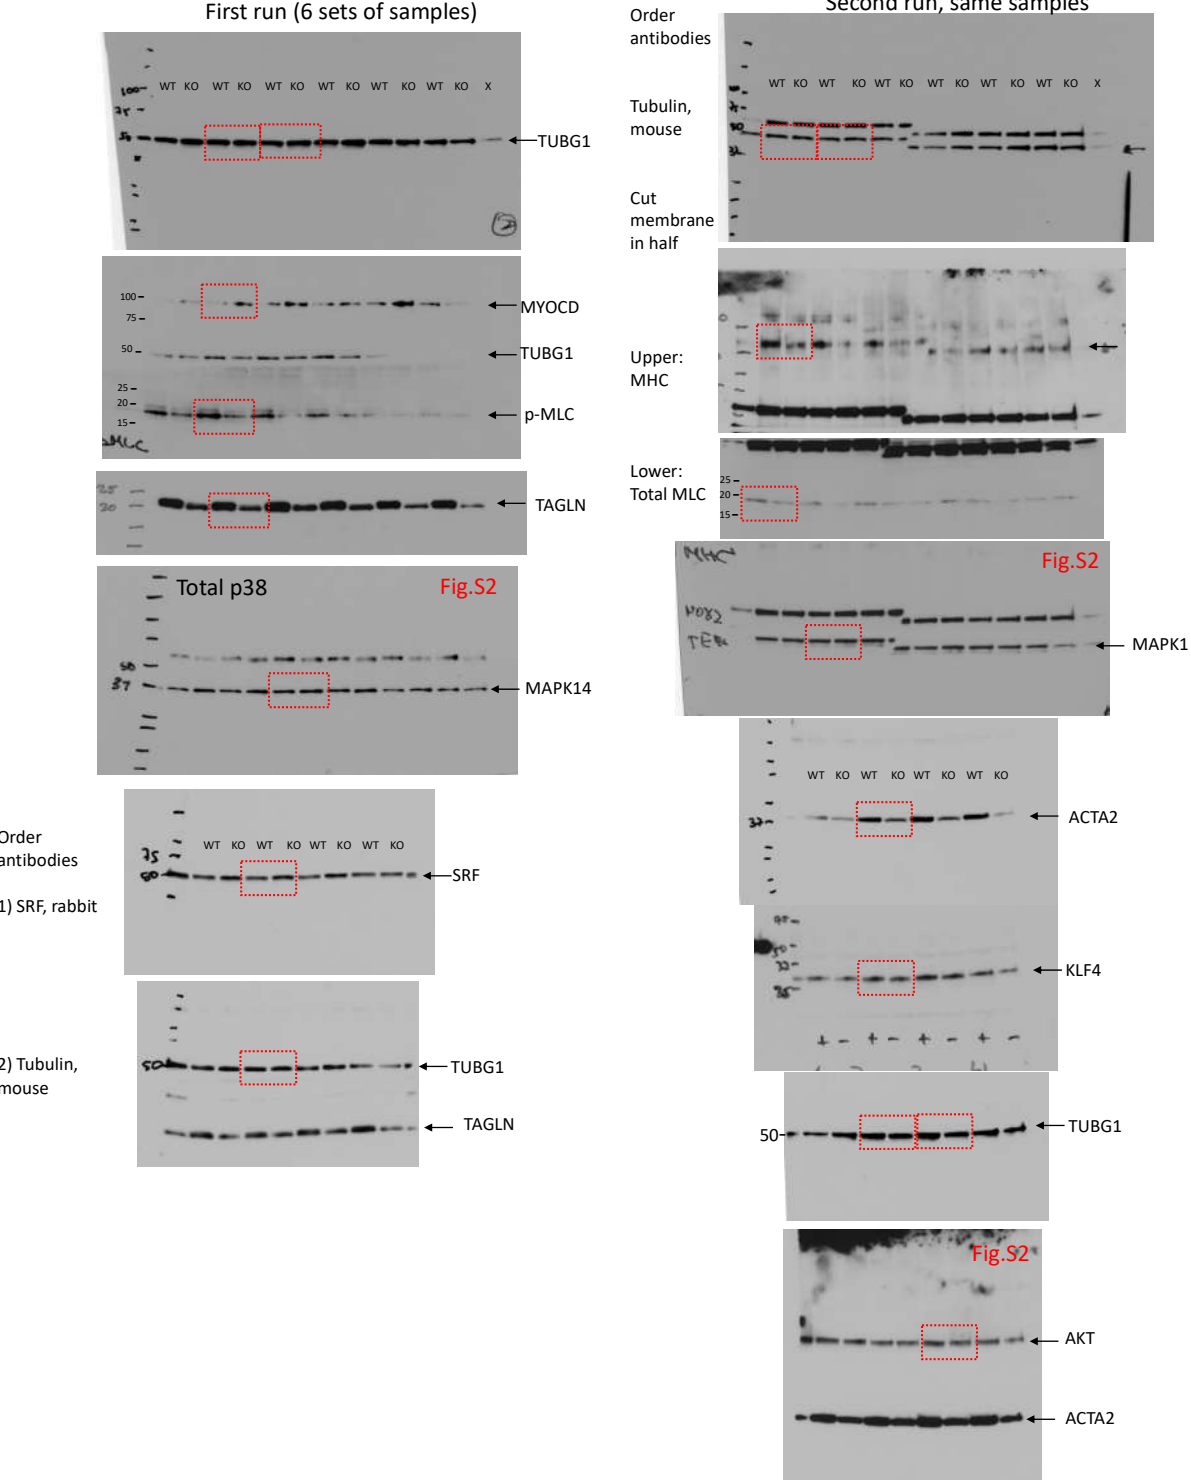

**Figure 2G**

Order of  
antibodies for  
western blot:

1) KLF4, rabbit

Stripping

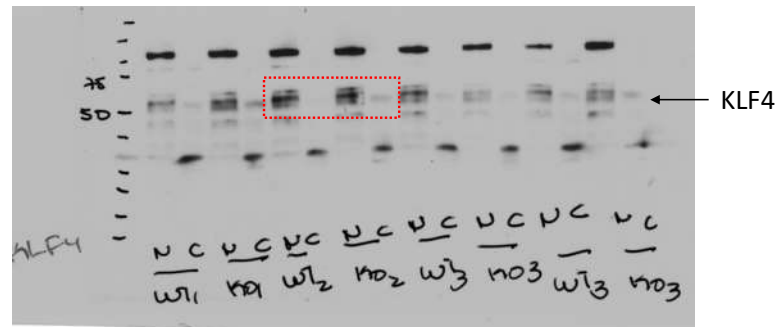

2) Myocardin,  
rabbit

Stripping

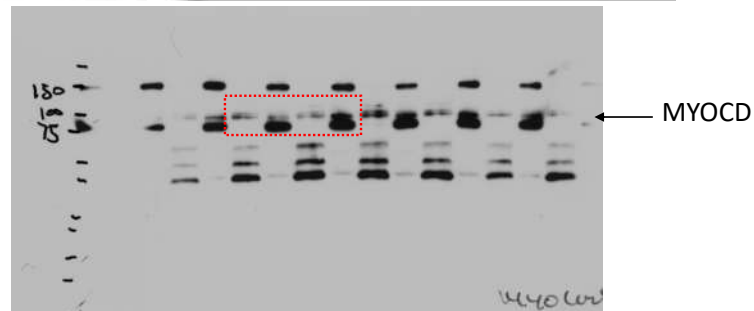

3) SRF, rabbit

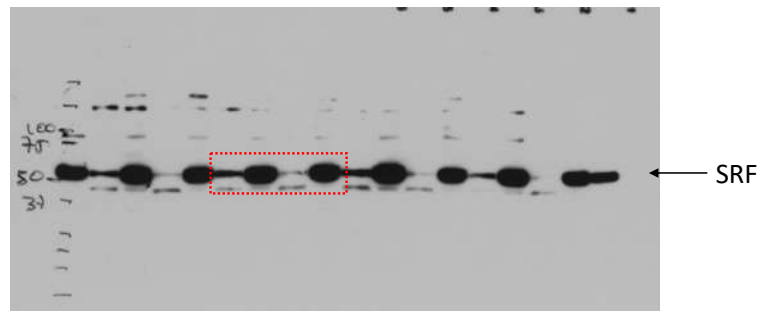

SRF, low exposure

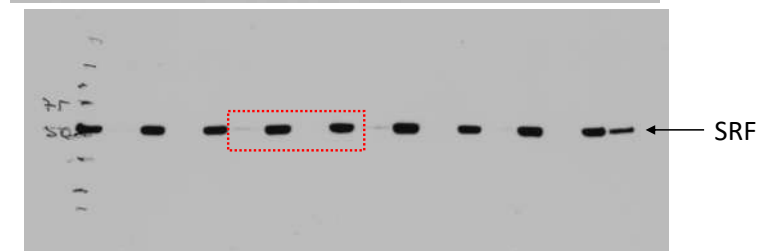

Cut membrane

4) Upper for  
Clathrin, mouse

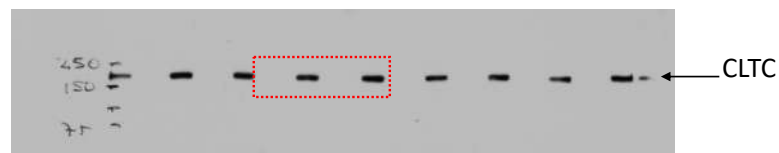

Lower for Histone  
H3

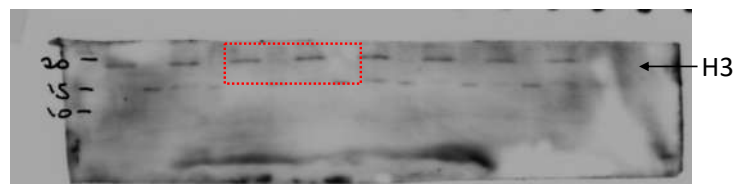

**Figure 3D**

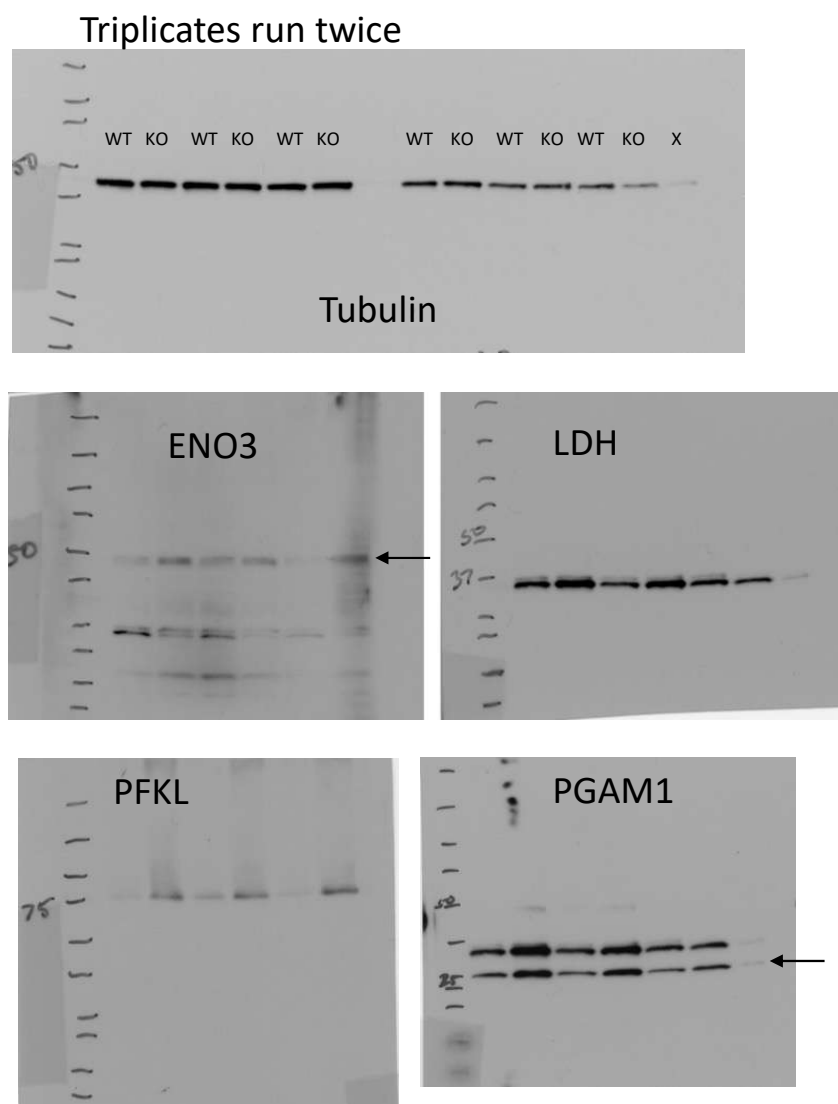

Order of antibodies for western blot:

1) MMP2, rabbit

Stripping

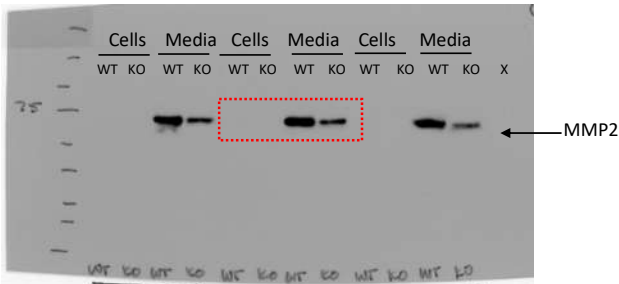

Figure 3G and 3L

Figure 3G

2) MMP3, rabbit

Stripping

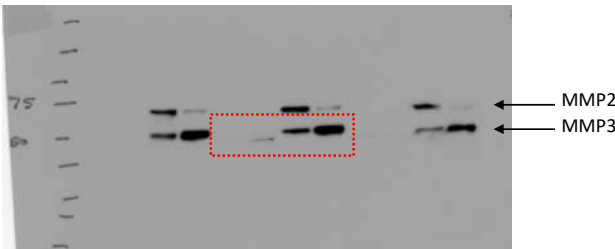

Figure 3G

3) MMP14, rabbit

Stripping

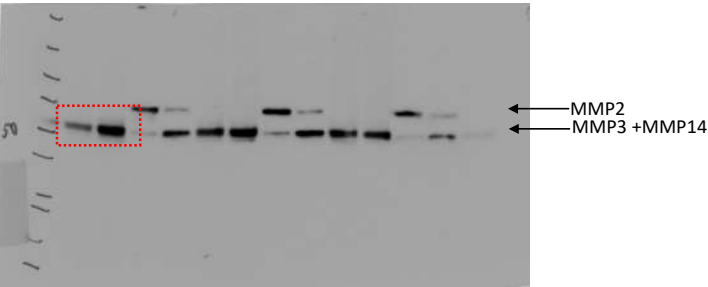

Figure 3L

4) Cathepsin D, goat

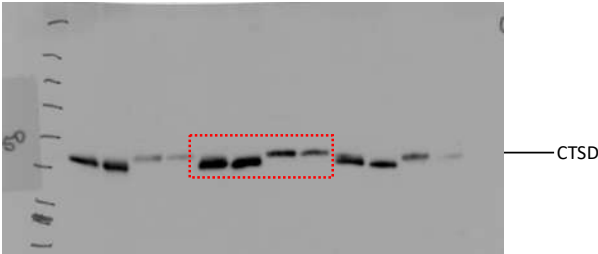

Figure 3G

5) Tubulin, mouse

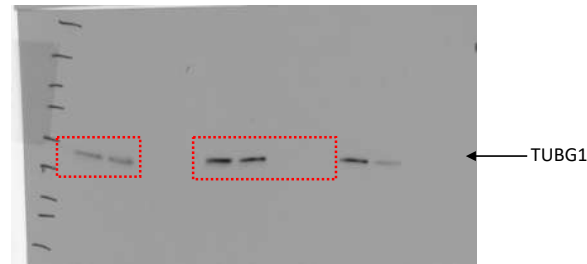

Figure 3G and 3L

6) Collagen 8, rabbit

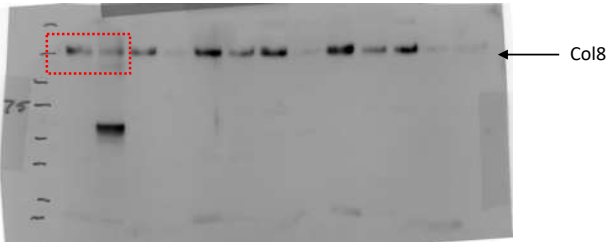

Figure 3L

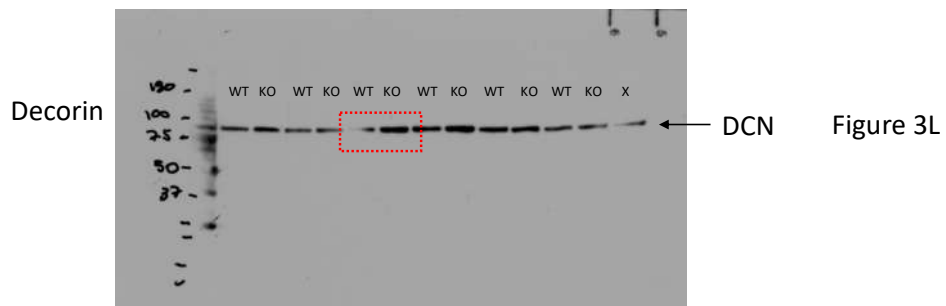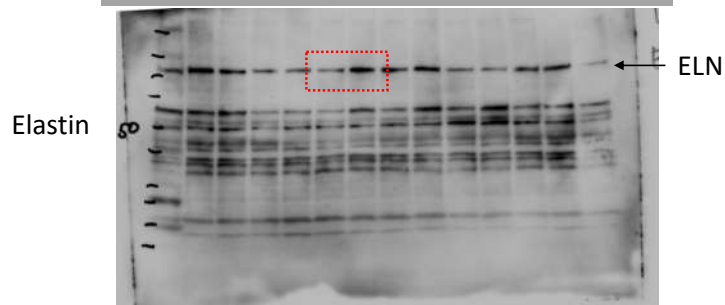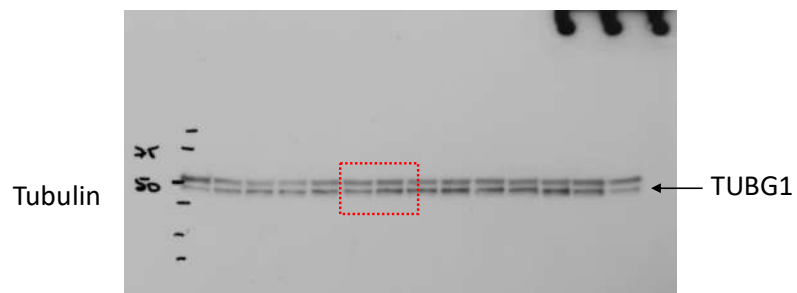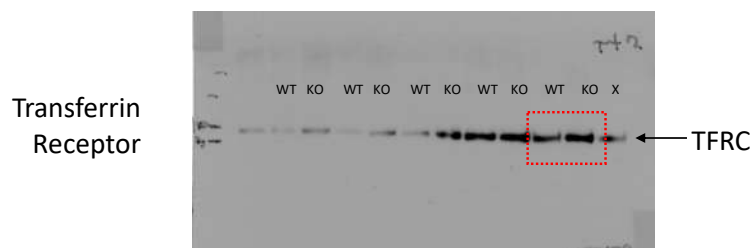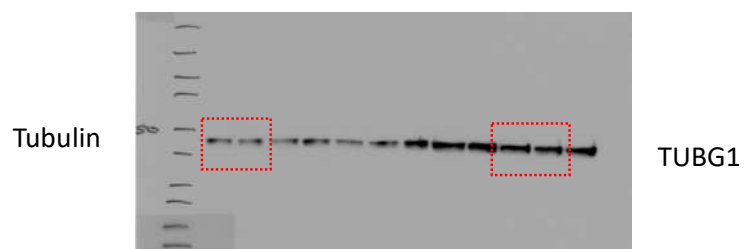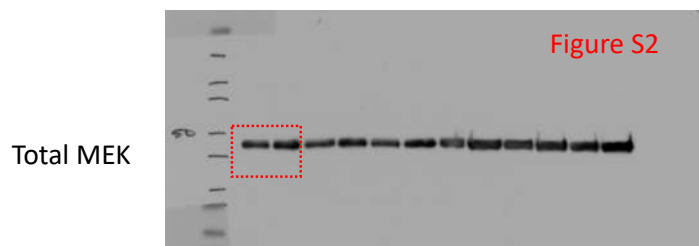

**Figure 4**

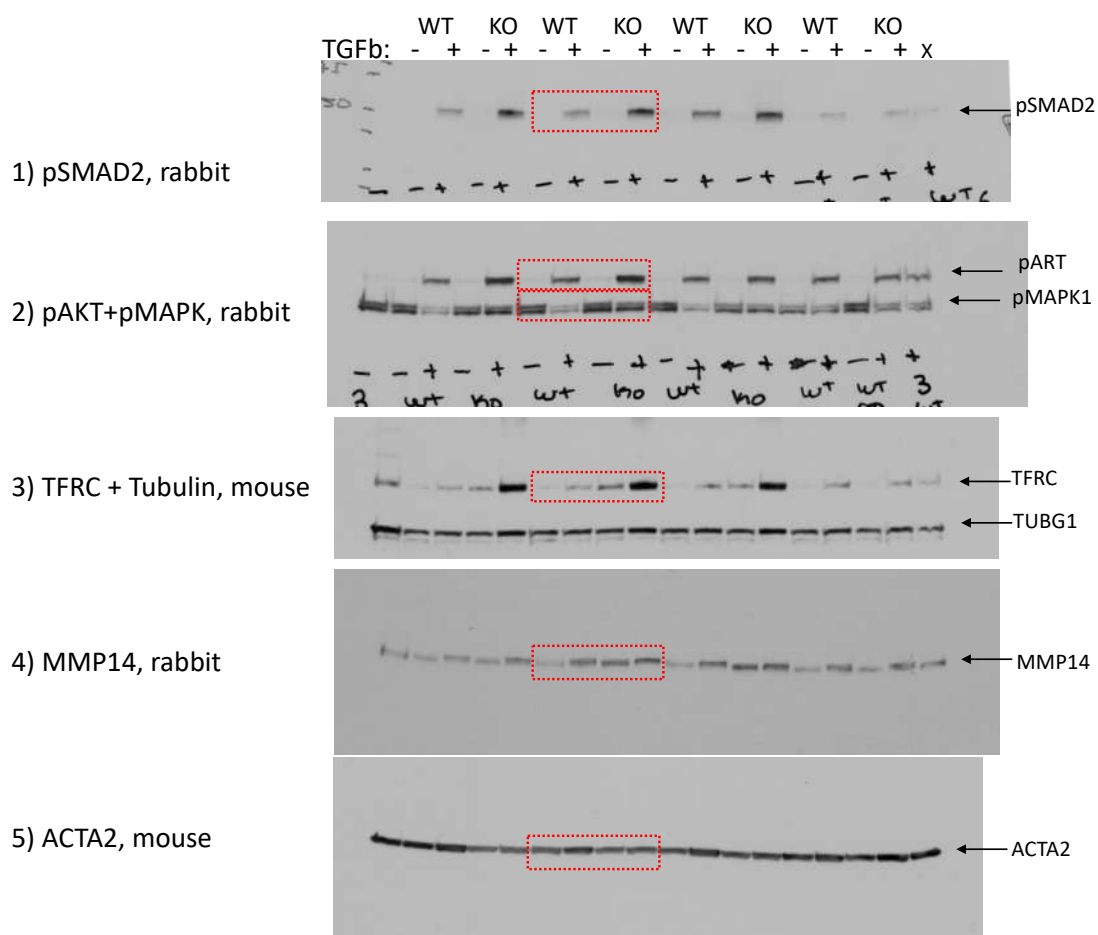

**Figure 3J**

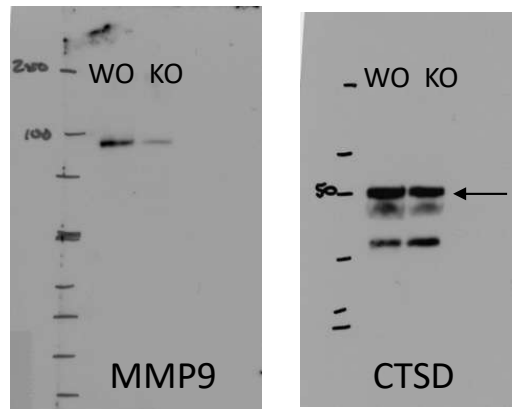

**Figure 5A**

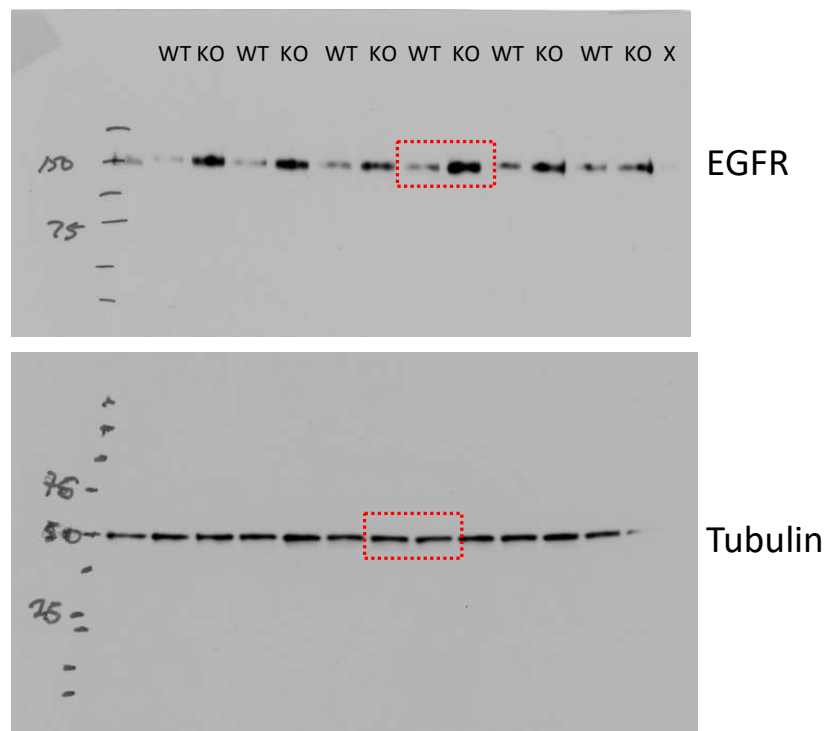

Order of  
antibodies for  
western blot:

1) pAKT, rabbit

Stripping

1) pERK, rabbit

2) ERFR, rabbit

3) Tubulin,  
mouse

1) TFRC, mouse

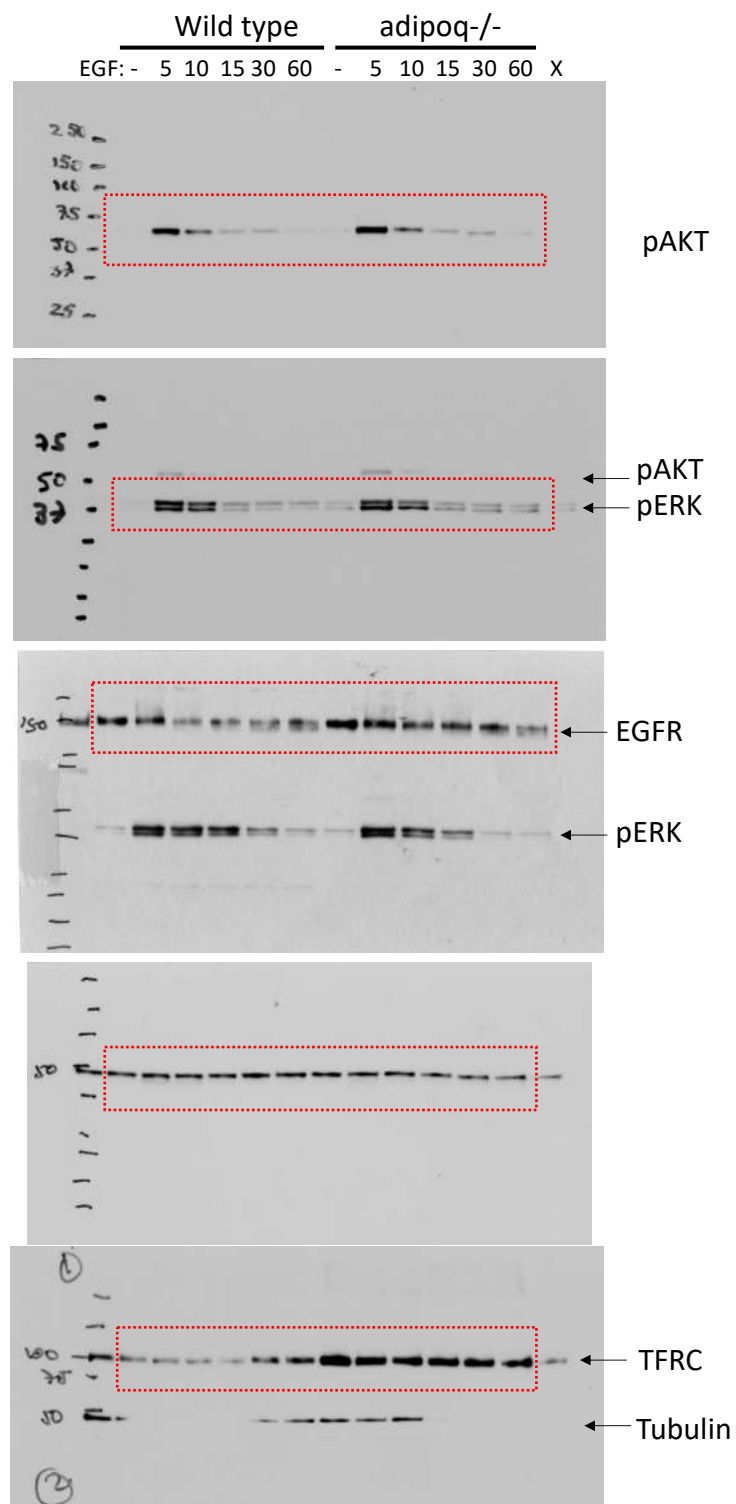

**Figure 5C**



Order of antibodies  
for western blot:

1) EGFR, rabbit

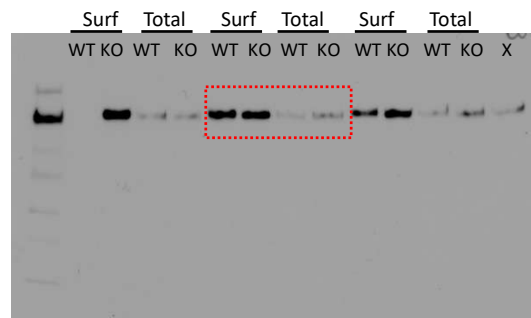

EGFR

2) Cav1, rabbit

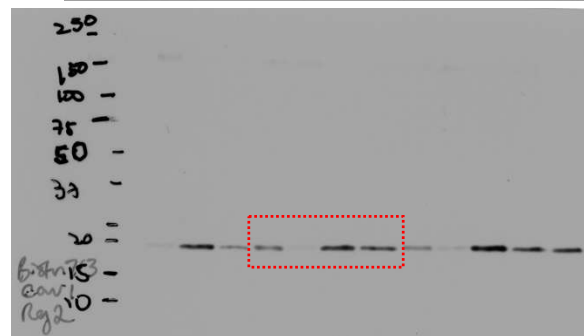

Caveolin 1

3) Clathrin (CLTC)+  
 $\beta$ -actin (ACTB)

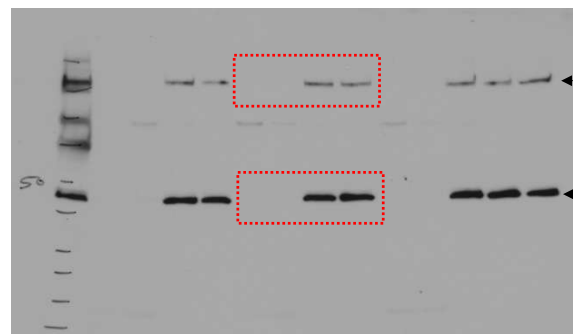

Clathrin

$\beta$ -actin

**Figure 5E**

Figure 6A, mTORC1 activity

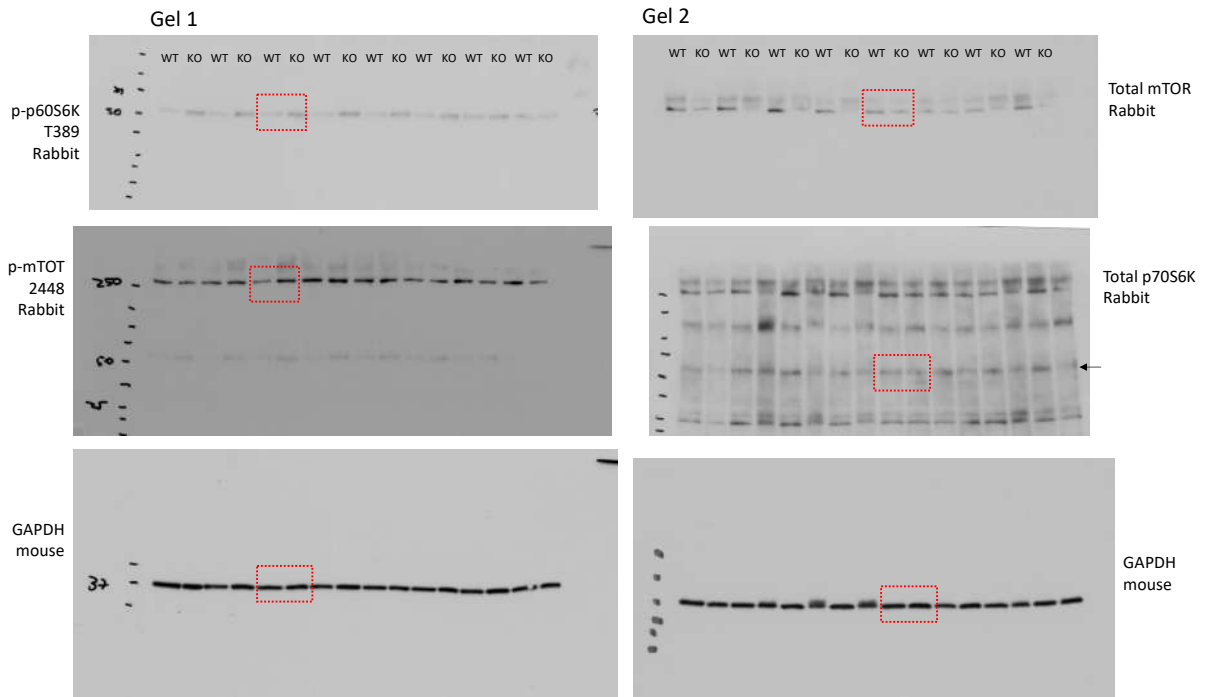

Adipoq<sup>-/-</sup>

TCB

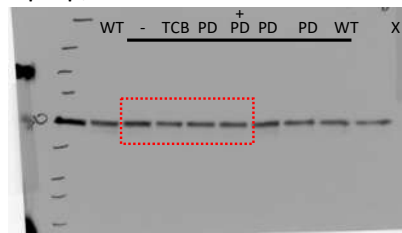

Order of antibodies  
for western blot:

1) Tubulin, mouse

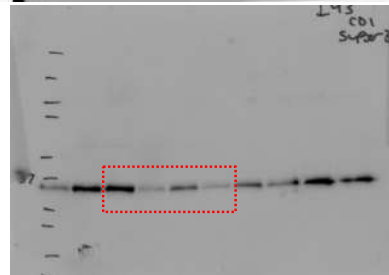

2) Cyclin D1, rabbit

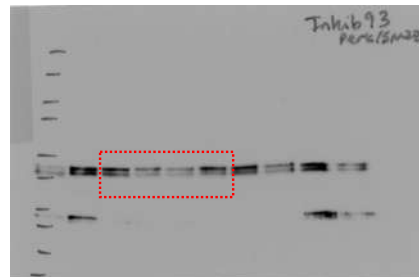

3) pERK, rabbit

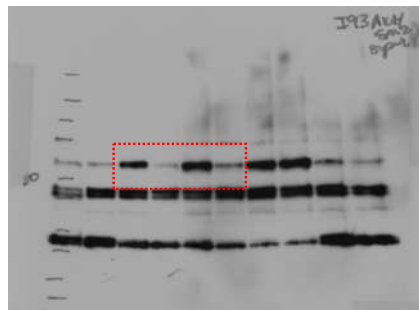

4) pAKT

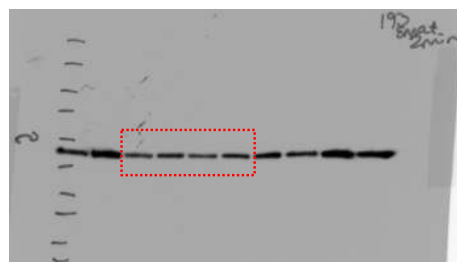

5) SMA, mouse

**Figure 6C, Akt, MAPK1 inhibitors**

Order of antibodies  
for western blot:

1) Cyclin D1, rabbit

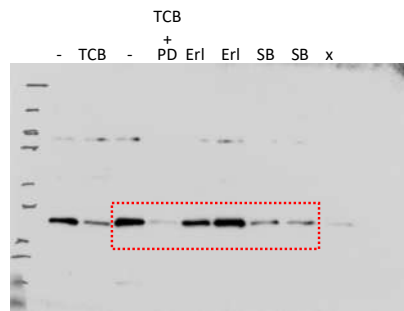

1) EGFR, rabbit  
SM22, rabbit

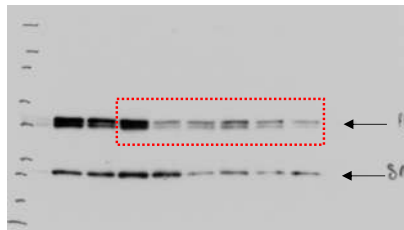

3) pAKT

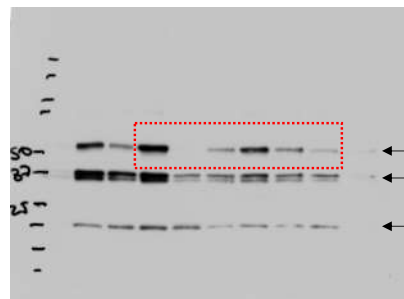

4) Tubulin

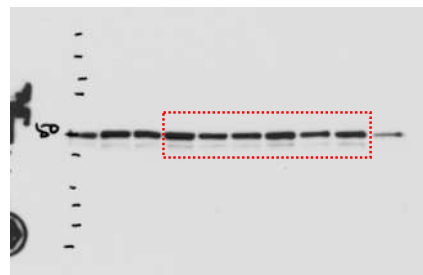

5) SMA

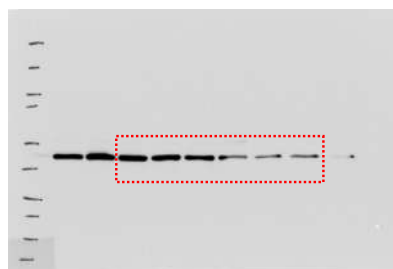

**Figure 6D, EGFR, TGF- $\beta$  inhibitors**

**Figure 7A, Media WT and KO**

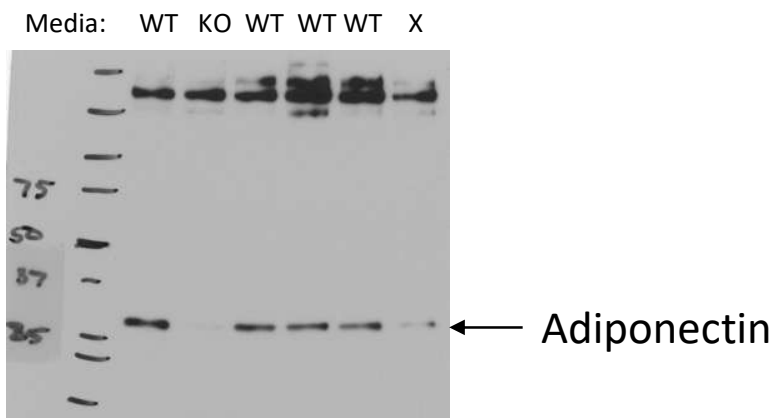

Figure 7B, Conditioned media

Order of antibodies for western blot:

1) Cyclin D1, rabbit

Stripping

2) pERK, rabbit

3) pAKT

4) Tubulin

Stripping

5) SMA

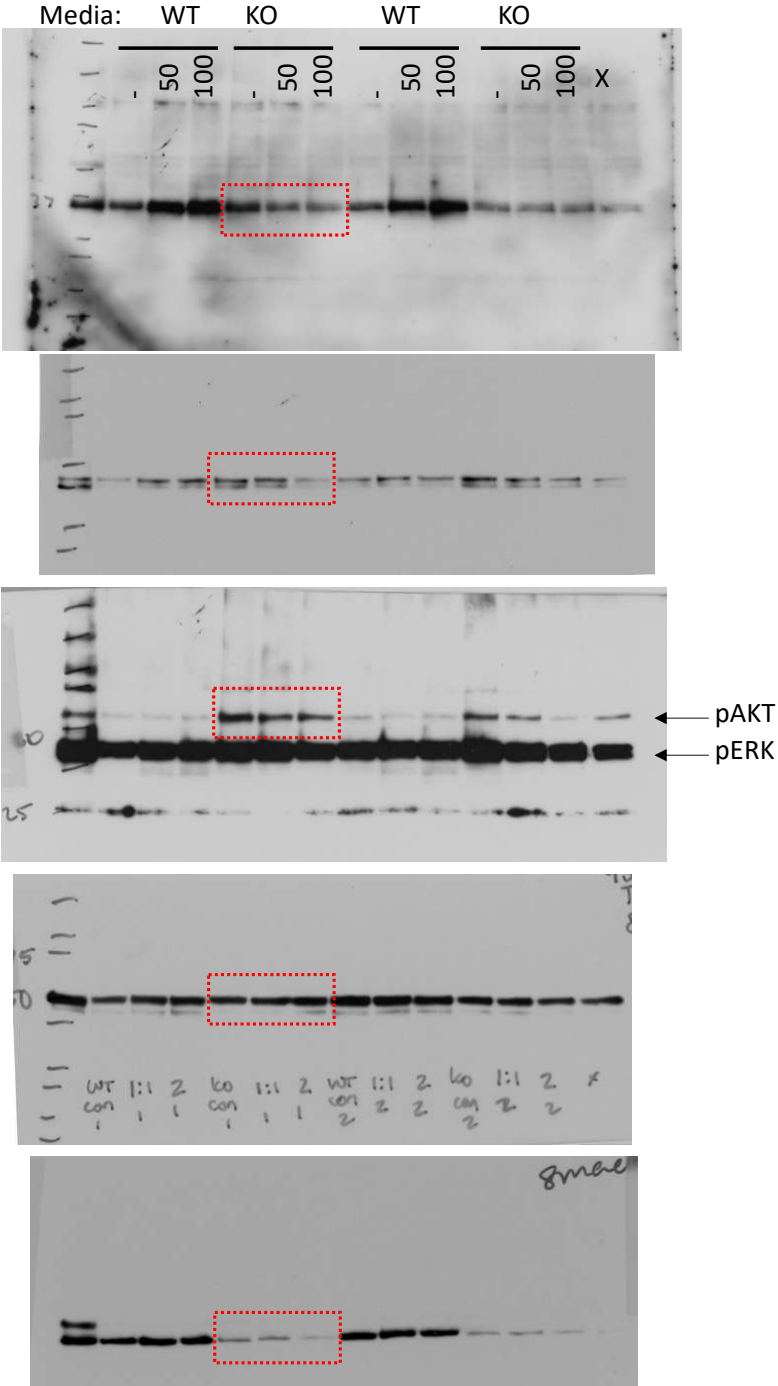



**Figure 7E, AdipoRon concentration curve**

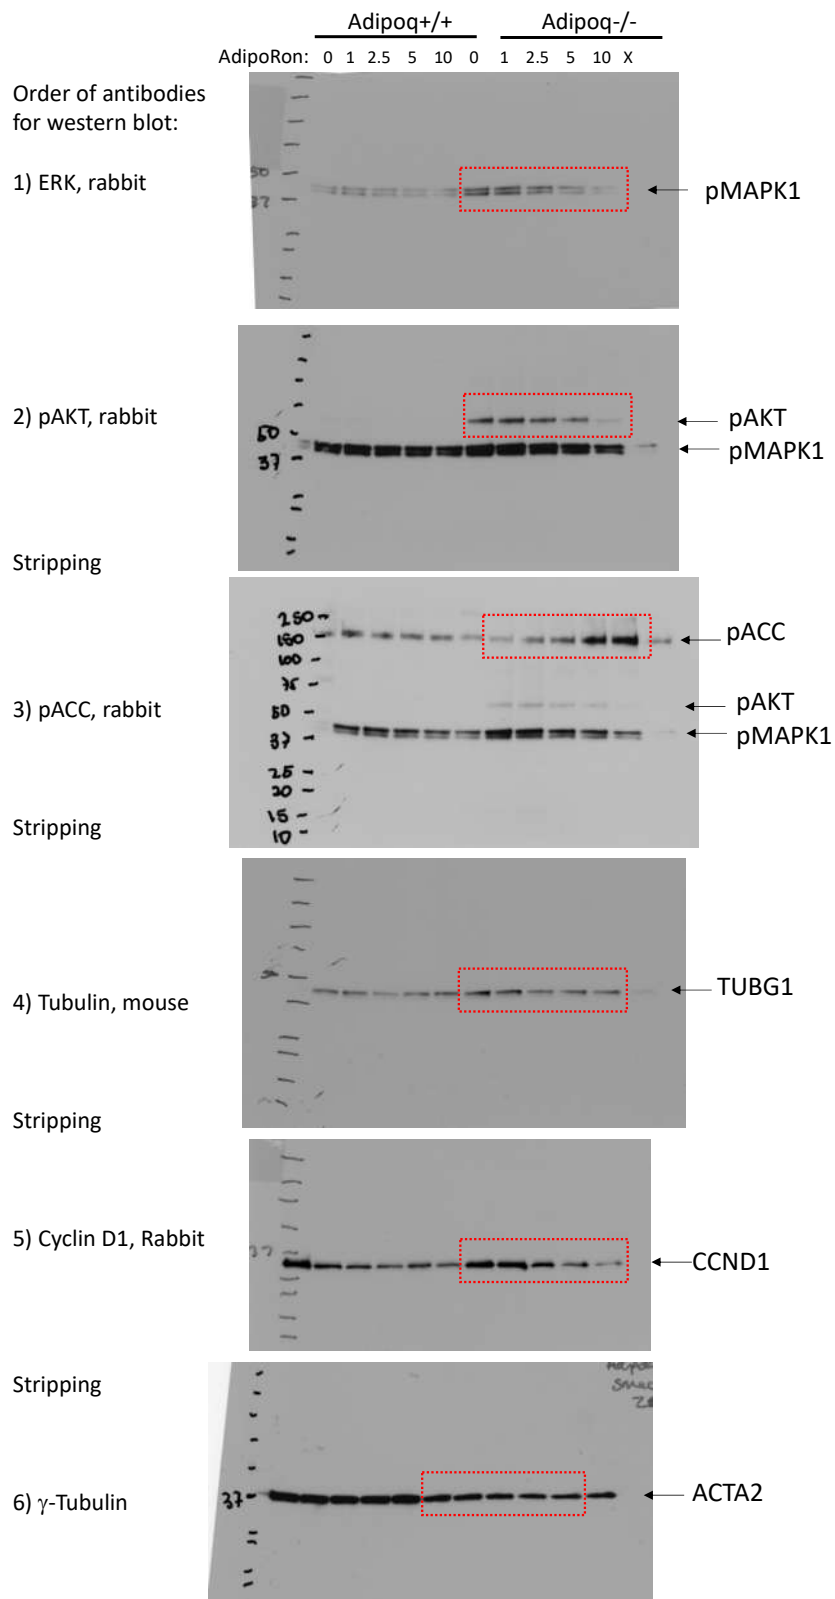



Figure 7F, metformin concentration curve

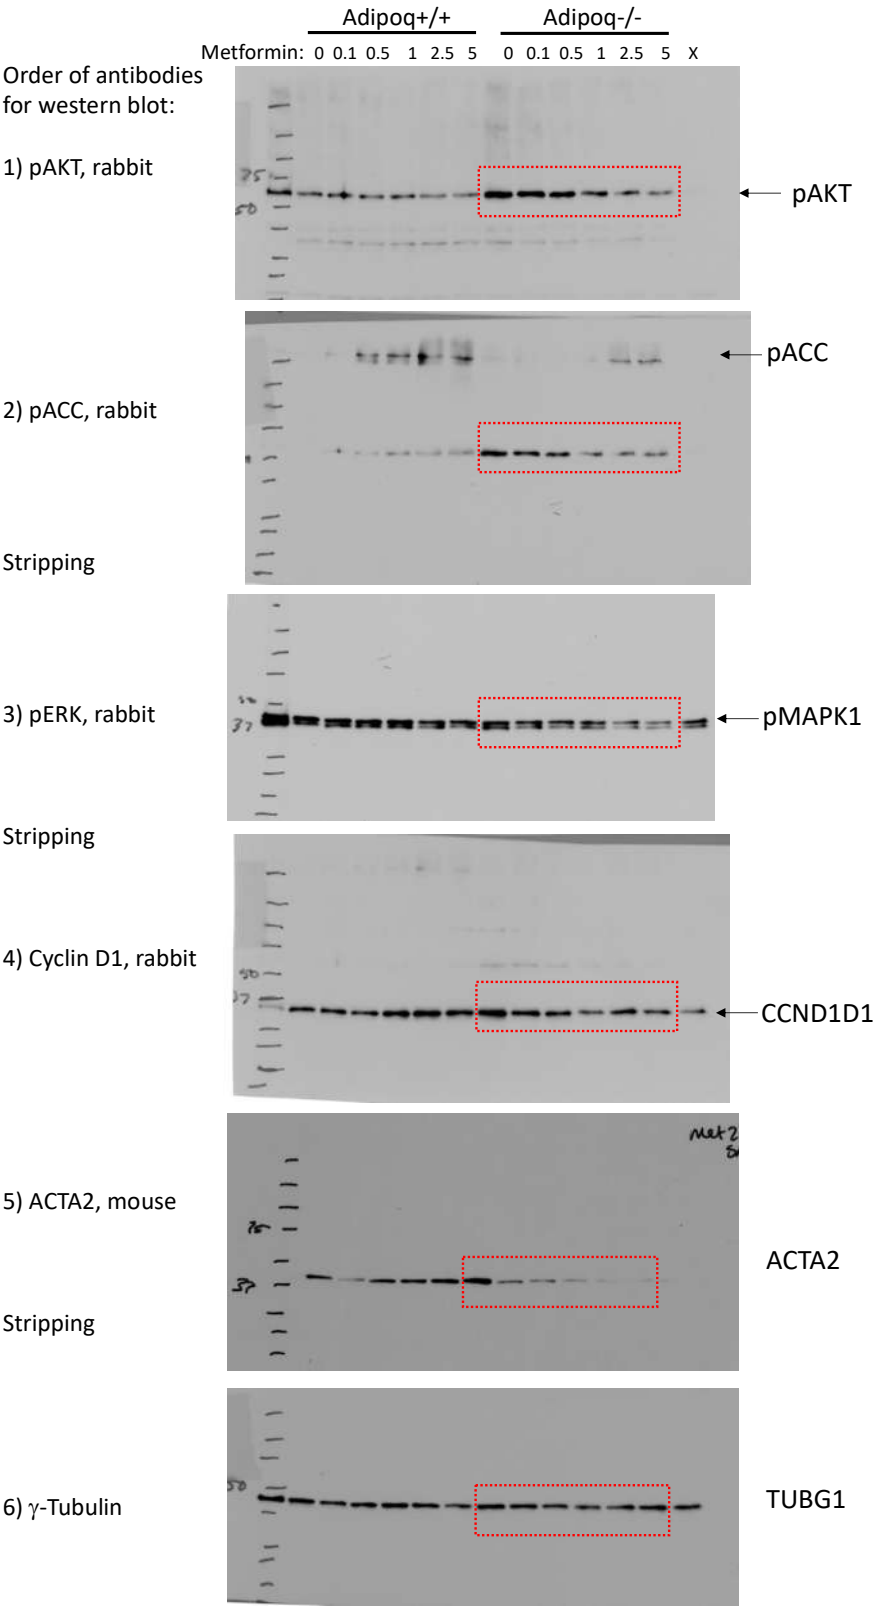

# Female Aortas

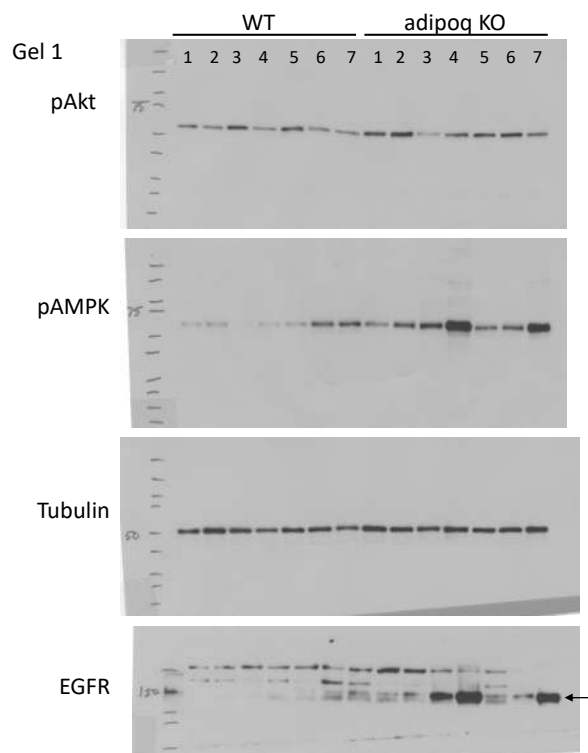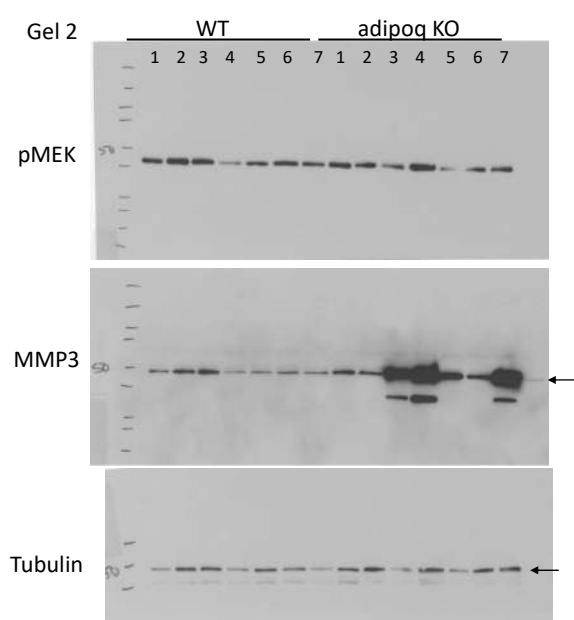

### Female Aortas

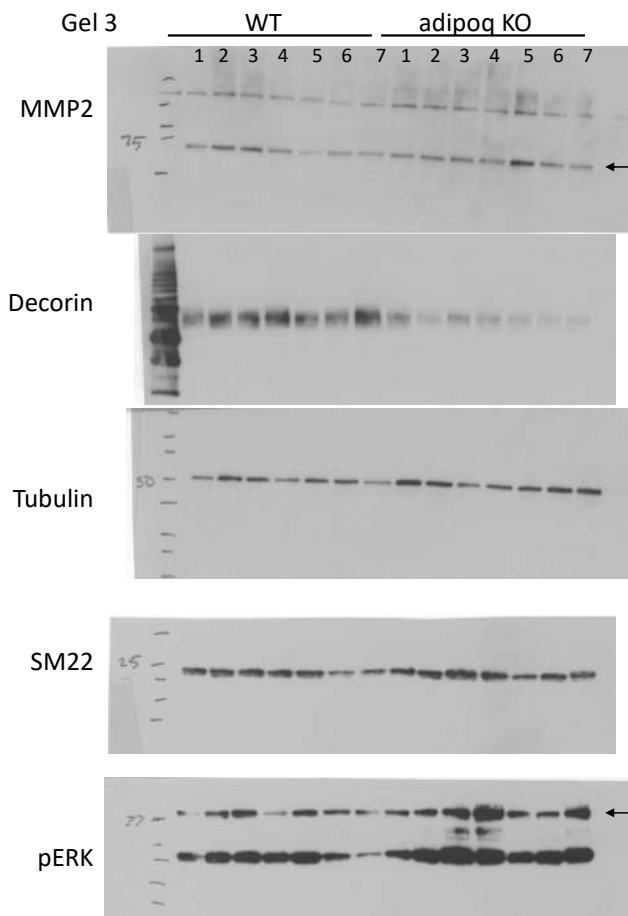

Male Aortas

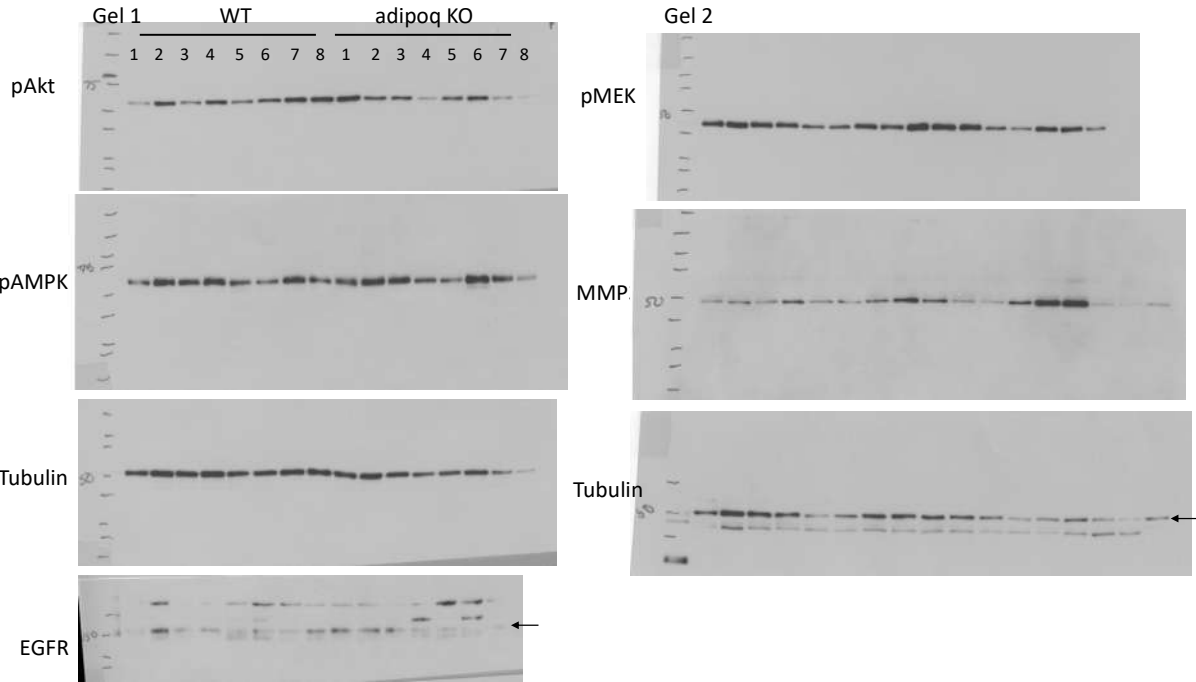

**Male Aortas**

Gel 3

Decorin

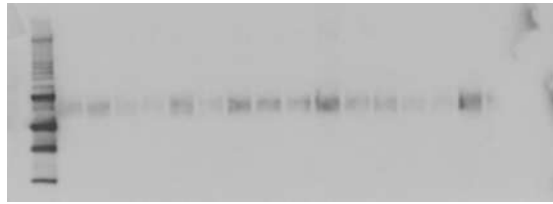

MMP2

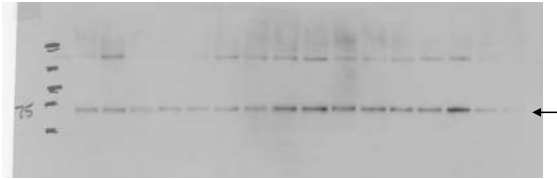

pERK

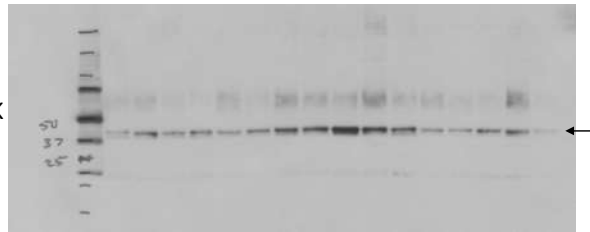

MMP3

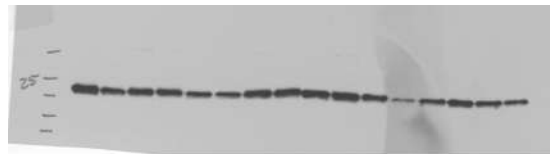

Tubulin

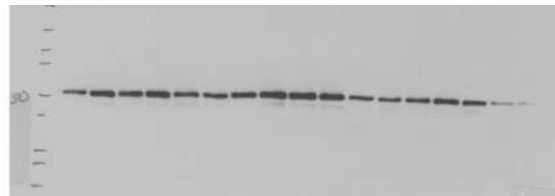

Supplement: s1 [file s1]
